# Supplementary material for: Impaired balance between neutrophil extracellular trap formation and degradation by DNases in COVID-19 disease
Source: PubMed Central journal article supplement (PMC10919029; doi:10.1186/s12967-024-05044-7), 2024-03-07
Supplement: 12967_2024_5044_MOESM1_ESM.pdf [file 12967_2024_5044_MOESM1_ESM.pdf]

**Supplementary Figure 1** –cfDNA according to COVID 19 clinical severity (a); ratios between cfDNA and functional DNase (b), DNase1 protein (c) and DNase1L3 protein (d). Results expressed in fold change and fold change ratio between non-severe (n = 32), severe (n = 15) and critical COVID-19 patients (n = 37) and healthy donors (n = 7). Comparisons between groups were performed using a Compound Poisson-Gamma model adjusted for age, sex and BMI.

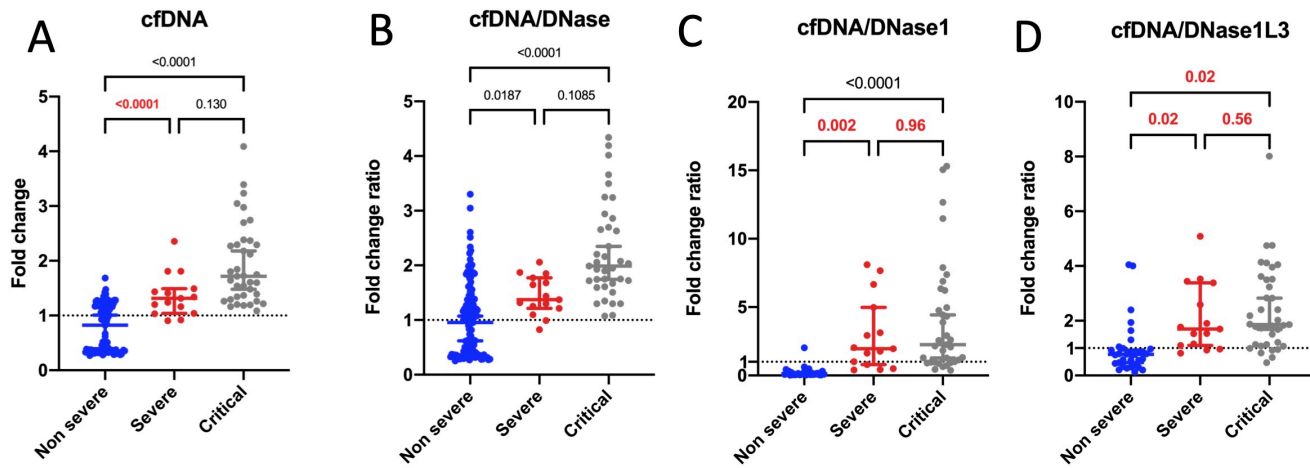

**Supplementary Figure 2** – Spearman correlation **adjusted for age, sex and BMI** between three NET biomarkers, MPO-DNA (a, d), H3cit (b, e), and H3cit-DNA (c, f) and two markers of disease severity, *i.e.* the PaO<sub>2</sub>/FiO<sub>2</sub> ratio (a-c) and the ROX index (d-f) (n =52).

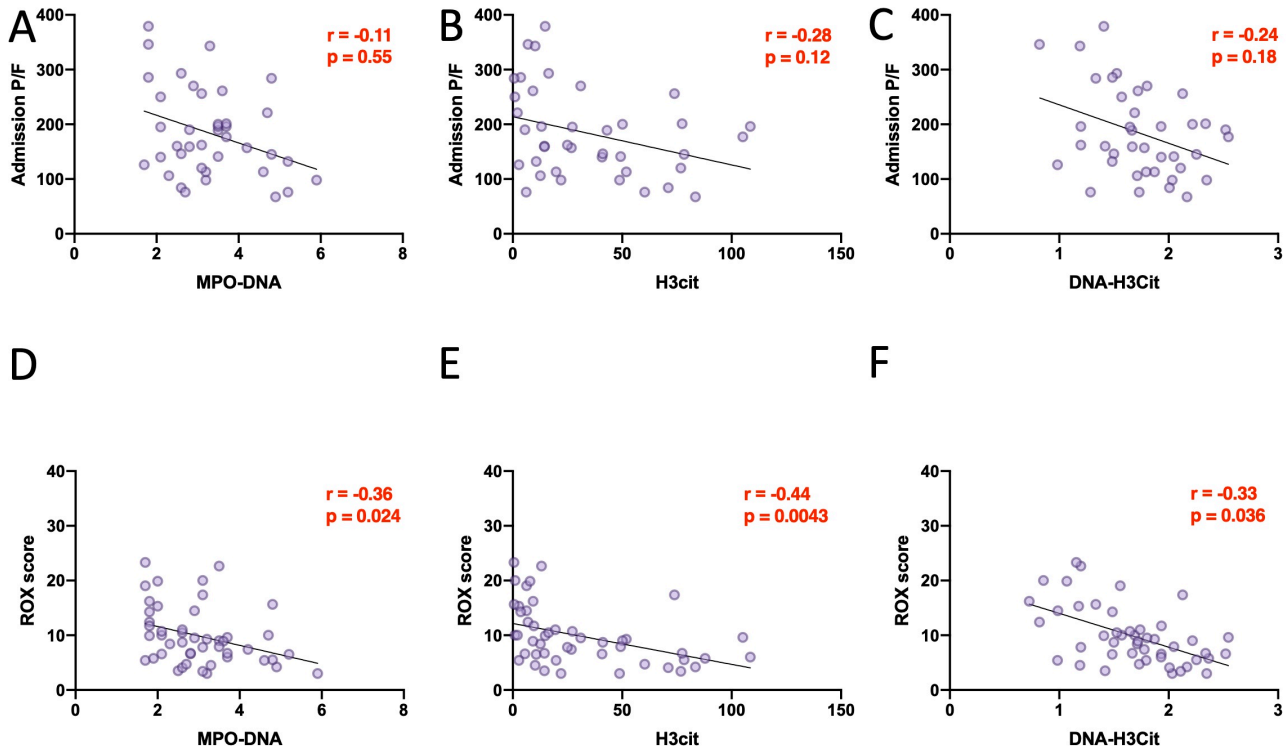

**Supplementary Figure 3** – Spearman correlation **adjusted for age, sex and BMI** between the ratios of three NET biomarkers, MPO-DNA (a, d), H3cit (b, e), and H3cit-DNA complexes (c, f) over functional DNase and two markers of disease severity, *i.e.* the PaO<sub>2</sub>/FiO<sub>2</sub> ratio (a-c) and the ROX index (d-f) (n =52).

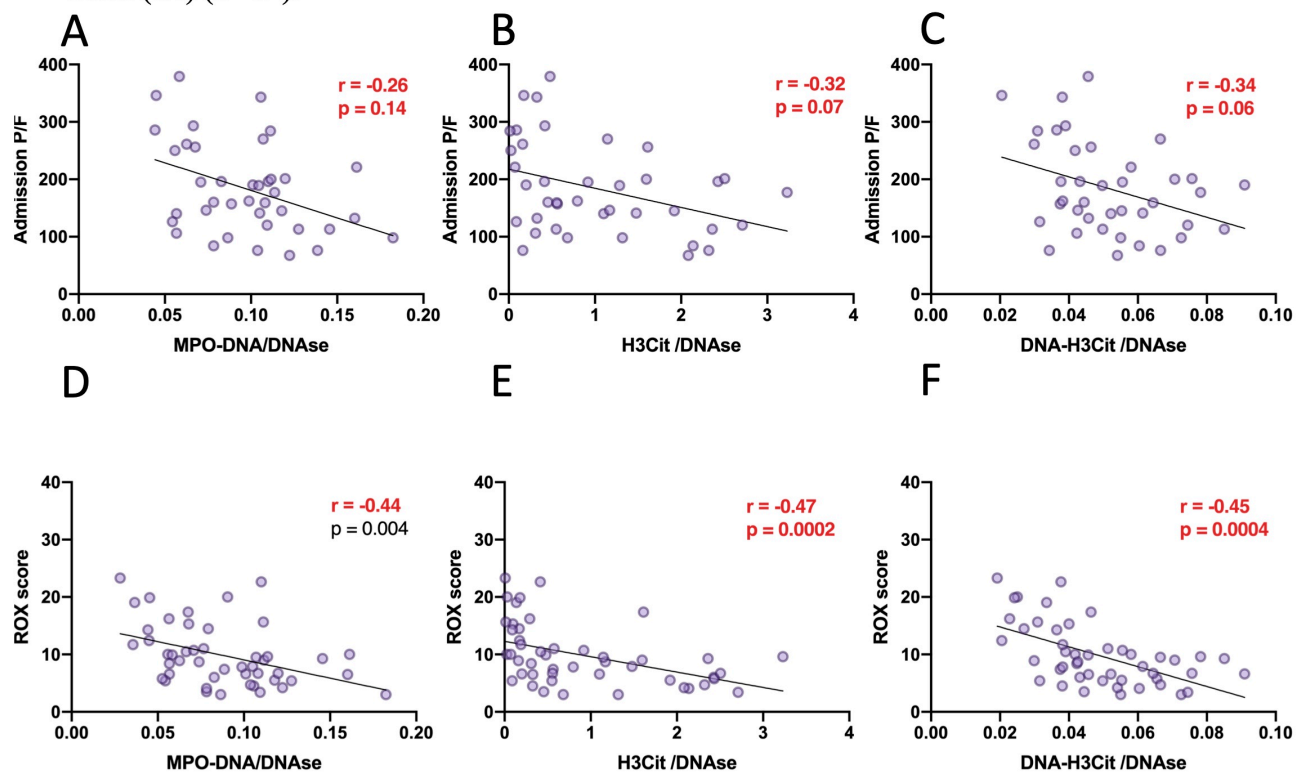

**Supplementary Figure 4** – Gating strategy for dendritic cells (cDC1 and cDC2) and plasmacytoid dendritic cells (pDCs) analysis. DC were selected from living Lin<sup>-</sup> cells after basophil exclusion, as CD14<sup>-</sup> and CD16<sup>-</sup>. Among DCs, pDC were defined as CD123<sup>+</sup>CD11c<sup>-</sup> cells and cDC as CD123<sup>-</sup>CD11c<sup>+</sup> cells. cDC1 and cDC2 subpopulations were discriminated by their expression of CD141 and CD1c.

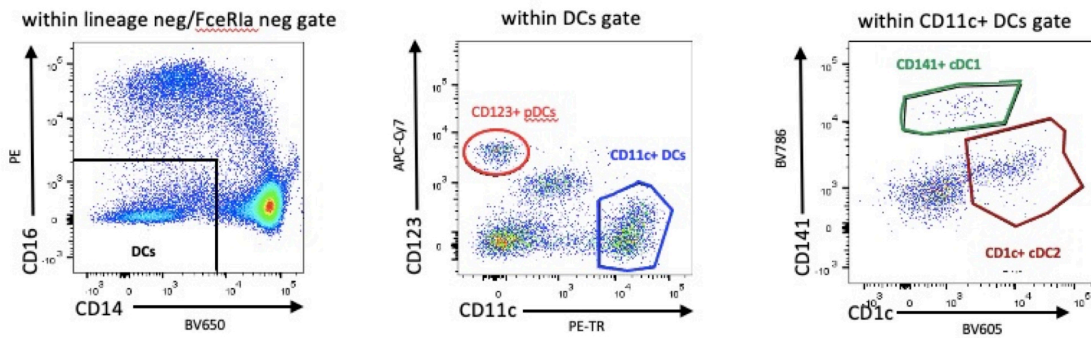

*Supplemental Table 1 – Primers used for DNASE1 genotyping*

| DNASE1                                                                        |   |                           |        |       |       |                |
|-------------------------------------------------------------------------------|---|---------------------------|--------|-------|-------|----------------|
| Accession <a href="#">NG_009285</a> Transcript ID <a href="#">NM_005223.3</a> |   |                           |        |       |       |                |
| ID                                                                            |   | Sequence (5'→3')          | Length | Tm    | GC%   | Product length |
| DNASE1_5UTR                                                                   | F | TCCTGACTTTCGACCTTGGC      | 20     | 59.97 | 55.00 | 650            |
|                                                                               | R | ACCCCGCCACTCATTCTTG       | 20     | 60.61 | 55.00 |                |
| DNASE1_EX1a                                                                   | F | CTTCAGACGTCCAGTCTCCG      | 20     | 59.83 | 60.00 | 872            |
|                                                                               | R | CCAGGCCTCAGGTCCAGTAA      | 20     | 60.91 | 60.00 |                |
| DNASE1_EX1b                                                                   | F | CCAAGAAATTACTGGACCTGAGGC  | 24     | 61.40 | 50.00 | 522            |
|                                                                               | R | AAAATGTCTGATAACAAGGCCAAAG | 25     | 58.54 | 36.00 |                |
| DNASE1_EX1c                                                                   | F | ACGGGATAGGAACCTTTGGC      | 20     | 59.74 | 55.00 | 614            |
|                                                                               | R | TCCTACAACGTCCAGAAAGCC     | 21     | 60.00 | 52.38 |                |
| DNASE1_EX2                                                                    | F | GTTTGGCTTTCTGGACGTTGT     | 21     | 59.60 | 47.62 | 656            |
|                                                                               | R | ATGTCATAGCGGCTCAGGATCT    | 22     | 61.09 | 50.00 |                |
| DNASE1_EX3-4                                                                  | F | CTTTGTGGCGCTGTAGGGT       | 19     | 60.30 | 57.89 | 482            |
|                                                                               | R | TAGGACAAACTACTTCCCTGCTC   | 23     | 59.49 | 47.83 |                |
| DNASE1_EX5-6                                                                  | F | CTCCTGGGAAGCAGGAGTG       | 19     | 60.9  | 63.2  | 674            |
|                                                                               | R | CTGGGAGGGTCTCACATAGC      | 20     | 59.7  | 60    |                |
| DNASE1_EX7-8                                                                  | F | ATGTCCAAGAGAAATGGGGCT     | 21     | 59.36 | 47.62 | 799            |
|                                                                               | R | GTCTGGGCTGAGCCTACCTG      | 20     | 61.97 | 65.00 |                |
| DNASE1_EX9                                                                    | F | GTATGTGTCCTCCCTGCACA      | 21     | 60.00 | 52.38 | 364            |
|                                                                               | R | CATGGTGGGCCGCTTGAAT       | 19     | 61.05 | 57.89 |                |

*Supplemental Table 2 – Primers used for DNASE1L3 genotyping*

| <b>DNASE1L3</b>                                                               |   |                             |               |           |            |                       |
|-------------------------------------------------------------------------------|---|-----------------------------|---------------|-----------|------------|-----------------------|
| Accession <a href="#">NG_032070</a> Transcript ID <a href="#">NM_004944.4</a> |   |                             |               |           |            |                       |
| <b>ID</b>                                                                     |   | <b>Sequence (5'-&gt;3')</b> | <b>Length</b> | <b>Tm</b> | <b>GC%</b> | <b>Product length</b> |
| DNASE1L3_EX1                                                                  | F | TCCTCAGAGAACTGAAAGTTGC      | 22            | 58.27     | 45.45      | 415                   |
|                                                                               | R | CAAGCCAGCTTCTACATTCCC       | 21            | 58.98     | 52.38      |                       |
| DNASE1L3_EX2                                                                  | F | CACTCAGTGCAATACTTAAAAACAG   | 25            | 57.16     | 36.00      | 311                   |
|                                                                               | R | CAACACTGGCTGTGTGAACTG       | 21            | 59.94     | 52.38      |                       |
| DNASE1L3_EX3                                                                  | F | GCGTATGGAGGCAGATTGGA        | 20            | 59.89     | 55.00      | 325                   |
|                                                                               | R | AGGCCCTAGTTTTGACAGC         | 20            | 59.96     | 55.00      |                       |
| DNASE1L3_EX4                                                                  | F | AGAAAGCCATGGGAACCTACA       | 21            | 59,01     | 47,62      | 353                   |
|                                                                               | R | CACTGAACTGCATCGTCTACATTG    | 24            | 60,2      | 45,83      |                       |
| DNASE1L3_EX5                                                                  | F | CTGGTTTCCCTCCAGCAGTGT       | 21            | 62.27     | 57.14      | 337                   |
|                                                                               | R | GCTGAAGAAAGGCCTTAAAGAATGC   | 25            | 61.13     | 44.00      |                       |
| DNASE1L3_EX6                                                                  | F | TCAGCCCATAACAGACCCTG        | 20            | 59.09     | 55.00      | 695                   |
|                                                                               | R | ACATTTAATTGACTCAGCTCTGC     | 23            | 57.44     | 39.13      |                       |
| DNASE1L3_EX7                                                                  | F | GAACCATGGCAGGGACTGAT        | 20            | 59.74     | 55.00      | 633                   |
|                                                                               | R | AGGGTCAAGGTCTAGTGCCC        | 20            | 60.91     | 60.00      |                       |
| DNASE1L3_EX8                                                                  | F | CCTCCCTGGTCCTAAATTTGC       | 21            | 58.62     | 52.38      | 768                   |
|                                                                               | R | GATGACACTGATGCTTCCTGG       | 21            | 58.71     | 52.38      |                       |

**Supplemental Table 3 – Antibodies used for Flow Cytometry experiments**

| <b>Fluorochrome</b> | <b>Marker</b> | <b>Company</b>     | <b>Clone</b> | <b>Dilution</b> | <b>Purpose</b> |
|---------------------|---------------|--------------------|--------------|-----------------|----------------|
| BV510               | CD3           | BD<br>Bioscience   | UCHT1/563109 | 1:100           | T cells        |
| VioGreen            | CD8           | Miltenyi           | REA734       | 1:100           | T cells        |
| VioGreen            | CD19          | Miltenyi           | REA675       | 1:100           | B cells        |
| BV510               | CD56          | Biologend          | HCD56        | 1:100           | NK cells       |
| 405/520             | Viability     | Miltenyi           | -            | 1:1000          | Viability      |
| PerCP-700           | FCeRIa        | Miltenyi           | REA758       | 1:100           | Basophils      |
| BV650               | CD14          | Biologend          | M5E2         | 3:100           | Monocytes      |
| PE                  | CD16          | Beckman<br>Coulter | A07766       | 1:25            | Monocytes      |
| APC-Vio 770         | CD123         | Miltenyi           | REA918       | 1:100           | pDCs           |
| PE-Vio 615          | CD11c         | Miltenyi           | REA618       | 1:100           | DCs            |
| BV785               | CD141         | Biologend          | M80          | 1:100           | cDC1s          |
| BV605               | CD1c          | BD                 | F10/21A3     | 1:100           | cDC2s          |
| VioBlue             | HLA-DR        | Miltenyi           | REA805       | 1:20            |                |

**Supplemental Table 4** – List of DNASE1L3 polymorphisms identified in hospitalized patients

| rsID                      | Genomic position (GRCh38) | Alleles <sup>1</sup> | Amino Acid position | Localization |
|---------------------------|---------------------------|----------------------|---------------------|--------------|
| rs2292677                 | 58210912                  | c.-6G>A              |                     | 5'UTR        |
| rs34252389                | 58210856                  | c.51C>T              |                     | Exon 1       |
| rs3732631                 | 58208324                  | c.142-18G>T          |                     | Intron 1     |
| rs74350392                | 58205547                  | c.244G>C             | p.Gly82Arg          | Exon 3       |
| rs2070117                 | 58205539                  | c.252G>A             | p.Thr84=            | Exon 3       |
| rs17058970                | 58205515                  | c.276G>C             | p.Arg92=            | Exon 3       |
| rs3772985                 | 58200992                  | c.546+5G>T           |                     | Intron 5     |
| rs35677470                | 58197909                  | c.616C>T             | p.Arg206Cys         | Exon 6       |
| rs113844064               | 58197694                  | c.704+127G>T         |                     | Intron 6     |
| rs1210058558 <sup>2</sup> | 58193474                  | c.705-35G>A          |                     | Intron 6     |
| rs3732630                 | 58193301                  | c.801+42A>G          | p.Lys281=           | Intron 7     |
| rs144058112               | 58193270                  | c.801+73T>C          |                     | Intron 7     |
| rs3732629                 | 58193139                  | c.801+204G>A         |                     | Intron 7     |
| rs34882513                | 58192419                  | c.*268delC           |                     | 3' UTR       |

<sup>1</sup> : Nomenclature according to NM\_004944.4 reference.

<sup>2</sup> : This variant is present in less than 3 individuals in our cohort



**Supplemental Table 5 – List of DNASE1 polymorphisms identified in hospitalized patients**

| rsID                      | Genomic position (GRCh38) | Alleles <sup>1</sup> | Amino Acid position | Localization        |
|---------------------------|---------------------------|----------------------|---------------------|---------------------|
| NA <sup>2</sup>           | 3653234                   | c.-1812C>T           | NA                  | Upstream transcript |
| rs45564535                | 3653249                   | c.-1797A>C           | NA                  | Upstream transcript |
| rs45606645                | 3653474                   | c.-1572T>C           | NA                  | Upstream transcript |
| rs45626736                | 3653508                   | c.-1538G>A           | NA                  | Upstream transcript |
| rs111733271 <sup>2</sup>  | 3653575                   | c.-1471G>A           | NA                  | Upstream transcript |
| NA <sup>2</sup>           | 3653620                   | c.-1426A>T           | NA                  | Upstream transcript |
| NA <sup>2</sup>           | 3653653                   | c.-1393A>T           | NA                  | Upstream transcript |
| rs960348066 <sup>2</sup>  | 3653835                   | c.-1211A>C           | NA                  | Upstream transcript |
| rs865833716               | 3653840                   | c.-1206A>C           | NA                  | Upstream transcript |
| rs867920095               | 3653841                   | c.-1205A>G           | NA                  | Upstream transcript |
| rs77563984                | 3653879                   | c.-1167C>T           | NA                  | Upstream transcript |
| rs79356805                | 3653880                   | c.-1166C>G           | NA                  | Upstream transcript |
| rs45522434 <sup>2</sup>   | 3654385                   | c.-661C>A            | NA                  | Upstream transcript |
| rs17136471                | 3654596                   | c.-450G>A            | NA                  | Upstream transcript |
| rs45479597 <sup>2</sup>   | 3654737                   | c.-309G>A            | NA                  | 5UTR                |
| NA                        | 3654725_3654729           | c.-317_-313del       | NA                  | 5UTR                |
| rs769858733 <sup>2</sup>  | 3655050                   | c.-2+6C>T            |                     | Intron 1            |
| rs117176134               | 3655097                   | c.-2+54G>C           |                     | Intron 1            |
| NA <sup>2</sup>           | 3655333_3655336           | c.-1-40_-1-38del     |                     | Intron 1            |
| rs8176922                 | 3655358                   | c.-1-15C>T           |                     | Intron 1            |
| rs34907394 <sup>2</sup>   | 3655478                   | c.105G>C             | p.Glu35Asp          | Exon 2              |
| rs146417970               | 3655625                   | c.147+105T>C         |                     | Intron 2            |
| rs181314680               | 3655818                   | c.148-31C>G          |                     | Intron 2            |
| rs143058517 <sup>2</sup>  | 3656648                   | c.331G>A             | p.Val111Met         | Exon 5              |
| rs34923865 <sup>2</sup>   | 3656667                   | c.350A>C             | p.Tyr117Ser         | Exon 5              |
| NA <sup>2</sup>           | 3656722                   | c.405A>G             | p.(Pro135=)         | Exon 5              |
| rs8176938 <sup>2</sup>    | 3657090                   | c.528C>G             | p.Val176=           | Exon 6              |
| NA <sup>2</sup>           | 3657115                   | c.556A>T             | p.(Met186Leu)       | Exon 7              |
| rs1452101461 <sup>2</sup> | 3657326                   | c.689A>G             | p.His230Arg         | Exon 7              |
| rs1799892                 | 3657408                   | c.704+67G>C          |                     | Intron 7            |
| rs1053874                 | 3657746                   | c.731G>A             | p.(Arg244Gln)       | Exon 8              |
| NA <sup>2</sup>           | 3657788                   | c.773A>T             | p.(Gln258Leu)       | Exon 8              |

<sup>1</sup> : Nomenclature according to NM\_005223.4 reference

<sup>2</sup> : This variant is present in less than 3 individuals in our cohort
